# Supplementary material
Source: HighWire-hosted journal article supplement (https://gh.bmj.com/content/5/10/e002972)
Supplement: inline-supplementary-material-1 [file inline-supplementary-material-1.pdf]

## SUPPLEMENTARY FILE

Madeleine C Clarkson, Ricardo Aguas, Kathryn Sweet, Tamalee Roberts, Michel Strobel, Paul N Newton. How many human pathogens are there in Laos? An estimate of national human pathogen diversity and analysis of historical trends

### **A. Additional Methods**

#### **1. Exclusion Criteria**

Entries were excluded if: the disease or organisms was not specific to the species level; if the methodology used for the diagnosis was unclear and therefore could not be assigned an appropriate evidence grade; if the outcome of tests or examinations were unclear or returned a negative result; if the discovered organism was known not to be an agent of human infection or disease; if a symptom was described but could not be traced to a single causative organism (specifically referencing clinical diagnoses); if the organism could not be traced to current taxonomic practise or the causative agent could not be derived from the translation (unclear handwriting and or missing text). Reports of infectious diseases among emigrants, travellers and refugees were excluded as there is uncertainty whether the pathogen was contracted in Laos.

#### **2. Notes on Lao Pathogen Line List Issues**

Data line items were individually considered for eligibility on the basis of: likelihood of presence of pathogen, specificity of disease, pathogenic nature of organism (either identified as non-pathogenic or non-pathogenic to humans), taxonomic level available, a likely misspecification or contaminant, unknown sample specimen or a specimen collected outside of Lao PDR. The compiled dataset was reviewed multiple times by MCC and PNN. Suspicious line items were followed up by a re-examining of the reference article and if need be further research or specialist consultation.

##### ***a. Unlikely Organisms***

A line item that was excluded on the basis of likelihood was the *Leishmania* genus. The report came from the annual national RLG hospital report of 1966 (1). In the report numbers of “consult” referring to patients was listed as 644 and was attended by “consultations” amounting to 1,351. However, no other information is provided, and patients were not

admitted nor received any days of treatment. The laboratory report at the end of the document gave no confirmatory evidence.

Historically there have been investigations into the presence of *Leishmania* in Laos. A report from 1937 documented a negative report resulting from an investigation of spleen smears of dogs from Vientiane for the presence of *Leishmania* (2). In even earlier reports, “Kala azar” was mentioned in Rapport Medical Mensuel from 1923 and 1924 which indicate it was being at least looked for in what we presume is now the Microbiology Laboratory at Mahosot Hospital, but without any details of what laboratory tests were performed or clinical details it is impossible to confirm this diagnosis (3,4). A 2012 journal article (5) and searches of Pubmed and Google Scholar revealed no further evidence of *Leishmania* in Laos. With this uncertainty we decided not to record this disease as present in Laos, However, *Leishmania* is an emergent threat in this region with a growing number of case reports from its neighbour, Thailand, suggesting that future discoveries are likely (6).

The other line item excluded on this basis, was the Ross River virus. This appeared as a short paragraph in a French publication (7). There was insufficient information in the publication to source the original report. Subsequent searching of Pubmed and Google Scholar suggested that Ross River virus is not known to be in Lao or in any adjacent countries.

### ***b. Unclear diagnosis***

An unclear diagnosis was one where either the report was misleading or did not provide detail on the level of the diagnosis or for which no clear inference could be made, as per example, “1 cas de spirochetose pulmonaire guéri par une injection intramusculaire” appeared in a 1920 report but the specific causative agent is unclear (8).

### ***c. Misidentification***

The first reports of schistosomiasis in Lao were as early as 1935 (9). The species that was recorded was stated to be *Schistosoma mansoni*. Later reports identify the species as *Schistosoma japonicum*. It was only in 1973, in a paper by Snormani et al., that it was first described as a separate species of a “japonicum-like” appearance (10). The “japonicum-like” species was given the name *Schistosoma mekongi* in 1978. The identification of the species is recognized in these data as 1973, as “japonicum-like” implies a distinct and separate organism (11). *Schistosoma mekongi* is clinically similar to *Schistosoma mansoni* and

*Schistosoma japonicum*, suggesting that the records of these two *Schistosoma* species were a consequence of misidentification (12).

*Isospora hominis* and *Sarcocystis hominis* were recorded as separate organisms in a paper by Giboda et al. (13). *Isospora hominis* was subsequently identified as a separate stage of the organism *Sarcocystis hominis* (14). This implies that Giboda et al. double reported the same organism as separate pathogens, resulting from the previous misclassification.

#### ***d. Non-pathogenic in humans***

For the purpose of this paper the Oxford English Dictionary definition of a pathogen was applied, which states (15): “A microorganism that can cause disease”

A combination of PubMed, Google Scholar and textbook searches were used to determine the pathogenic nature of organisms (16). Within the items not meeting the eligibility criterion of pathogenic organisms were: *Phthiriasis pubis* and *Pediculus humanus*. These organisms were excluded on the basis of not meeting the definition of being agents of disease. Pubic and head lice are associated with discomfort but we decided not to regard as causing disease.

However, the arthropods *Sarcoptes scabiei*, *Chrysomya bezziana* and *Demodex* spp. all meet the disease eligibility criterion and are included in the analysis, because they are associated with subsequent pathology post-inoculation.

#### ***e. Unspecified organisms associated with a disease, syndrome or pathogen description***

A number of the hospital reports and early documentation listed a disease, syndrome or pathogen description. For many diseases, syndromes and pathogen descriptions are sufficient to identify singular causative agent, such as is the case with measles that is caused solely by the measles virus. Two descriptions of herpes simplex virus (HSV) 1 and 2 were categorised by their clinical manifestation (HSV1 is an oral and HSV2 is a sexually associated infection (17)). However, a number of clinical and phenotypic descriptions are common to multiple organisms. The report of “hookworm” in the data, which can refer to multiple organisms, was a frequent example of this. Line items of this nature were excluded, as it was not specific enough to allow for inference as to the causative organism.

#### ***d. Probable contaminants***

Probable contaminants were identified by the isolate sample and the clinical features by PNN.

### *e. Samples collected outside Laos*

These reports were excluded during the selection of appropriate literature. as, inclusion of samples collected outside of Lao invites uncertainty into the likelihood of the pathogen being present in Lao. There is no way to be sure that the organisms identified were not acquired elsewhere. Temporary resettlement is identified as a contributing factor to communicable disease, making refugees more susceptible to diseases acquired as a result of the displacement (18).

### *f. Unknown samples*

A number of reports cited organisms without the sample from which they were isolated. Often the isolates were recorded as being sampled from "Divers" which translates from French to English as "various". Without this information it is not possible to assign a grade for the strength of evidence. Since the strength of evidence was the basis of the analysis these organisms were excluded from the analysis.

## References

1. Royaume du Laos ministère de Santé publique. Rapport Statistique de L'assistance Médicale. Vientiane; 1966.
2. Lefebvre. Recherches sur le Paludisme au Laos. Rev Med française d'extreme orient. 1937;336–51.
3. Assistance medicale Indochine. Rapport Medical Mensuel de Juillet 1923. 1923.
4. Assistance medicale du Laos Indochine. Rapport annuel 1924. 1924.
5. Viroj W. Leishmaniasis in Southeast Asia: The story of the emergence of an imported infection in a non-endemic area of the world. J Univ Malaya Med Cent. 2012;15(1):1–4.
6. Chusri S, Hortiwakul T, Silpapakul K, Siriyasatien P. Case report: Consecutive cutaneous and visceral leishmaniasis manifestations involving a novel Leishmania species in two HIV patients in Thailand. Am J Trop Med Hyg. 2012;87(1):76–80.
7. Cattin O. LAOS : UN PAYS ENCLAVE. Med Trop. 2000;60:121–4.
8. Assistance medicale Indochine. Rapport Medical Mensuel d'ensemble 1920. 1920.
9. Annual Report of Assistance Medicale du Laos. Paris; 1935.
10. Sornmani S, Schneider C, Kitikoon V. Life Cycles of Schistosoma Japonicum-Like Trematode From Khong Isand Southern Laos. South East Asian J Trop Medicine Public. 1973;4(2):279–?
11. Voge M, Bruckner D, Bruce JI, Voge, M., Bruckner, D., & Bruce J. Schistosoma mekongi sp. n. from Man and Animals, Compared with Four Geographic Strains of Schistosoma japonicum. J Parasitol [Internet]. 1978;64(4):577–84. Available from: <http://www.jstor.org/stable/3279936>

12. Ohmae H, Sinuon M, Kirinoki M, Matsumoto J, Chigusa Y, Socheat D, et al. Schistosomiasis mekongi: From discovery to control. *Parasitol Int.* 2004;53(2):135–42.
13. GIBODA M, Viengsay M, Bouaphan S, Ditrich O. EPIDEMIOLOGIE DES PARASITOSEES INTESTINALES AU LAOS. *Bull Société Pathol Exot.* 1991;84:184–93.
14. Palmer SR, Soulsby, Lord, Torgerson P, Brown DW. *Oxford Textbook of Zoonoses: Biology, clinical practice, and public health control.* second. Oxford: Oxford University Press; 2011.
15. OED Online. “pathogen, n.” [Internet]. Oxford University Press. 2016 [cited 2016 Aug 28]. Available from: <http://www.oed.com/view/Entry/138792?redirectedFrom=pathogen%5D>
16. Mandell GL, Bennett JE, Dolin R. *PRINCIPLES AND PRACTICE OF INFECTIOUS DISEASES.* 7th ed. Philadelphia: Elsevier Ltd; 2010.
17. Heymann DL. *Control of Communicable Diseases Manual.* 20th ed. Ross E, editor. Washington DC: Apha Press; 2015.
18. Connolly M, Gayer M, Ryan M, Salama P, Spiegel P, Heymann D. Communicable diseases in complex emergencies: impact and challenges. *Lancet.* 2004;364(9449):1975–83.

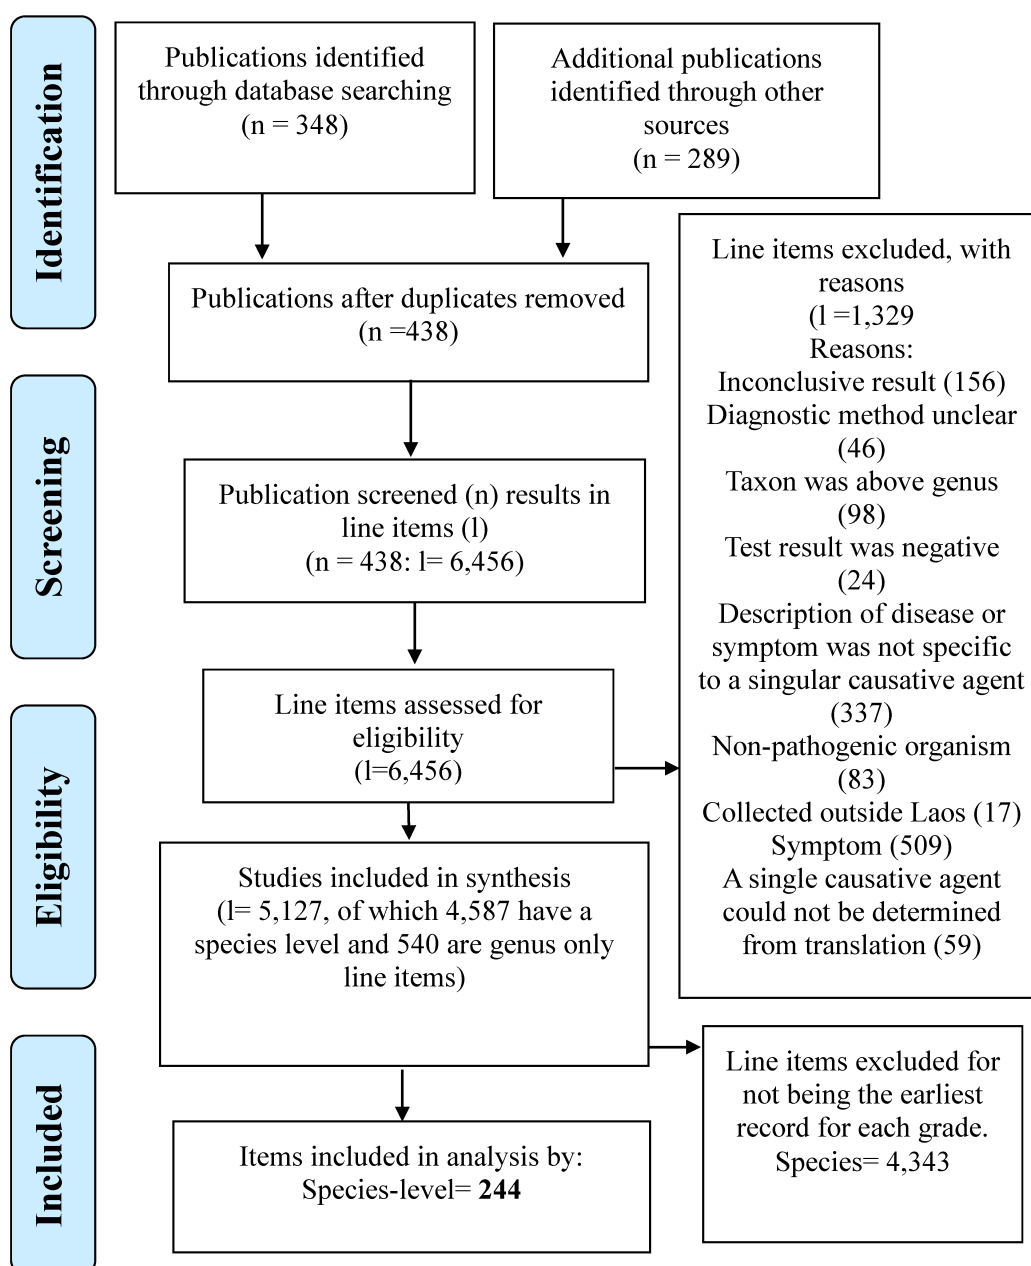

Figure 1: PRISMA diagram

Table 1 List of pathogens, the year of discovery in Laos and the grade of evidence.

| Year of discovery | Species name                        | Grade of strength of evidence used to make diagnosis |
|-------------------|-------------------------------------|------------------------------------------------------|
| 2011              | <i>Acinetobacter baumannii</i>      | 1                                                    |
| 2011              | <i>Actinomadura madurae</i>         | 1                                                    |
| 1925              | <i>Actinomyces israelii</i>         | 3                                                    |
| 1994              | <i>Aeromonas sobria</i>             | 1                                                    |
| 1929              | <i>Alcaligenes faecalis</i>         | 1                                                    |
| 2013              | Alpha coronavirus (HCoV-229E)       | 1                                                    |
| 2013              | Alpha coronavirus (HCoV-NL63)       | 1                                                    |
| 1989              | <i>Ancylostoma ceylanicum</i>       | 1                                                    |
| 1923              | <i>Ancylostoma duodenale</i>        | 1                                                    |
| 1971              | <i>Angiostrongylus cantonensis</i>  | 1                                                    |
| 1909              | <i>Ascaris lumbricoides</i>         | 3                                                    |
| 1923              | <i>Ascaris lumbricoides</i>         | 1                                                    |
| 1900              | <i>Bacillus anthracis</i>           | 3                                                    |
| 1929              | <i>Bacillus anthracis</i>           | 1                                                    |
| 1929              | <i>Balantidium coli</i>             | 1                                                    |
| 2009              | <i>Bartonella clarridgeiae</i>      | 1                                                    |
| 2008              | <i>Bartonella henselae</i>          | 2                                                    |
| 2013              | Beta coronavirus (HCoV--HKU1)       | 1                                                    |
| 2013              | Beta coronavirus (HCoV-OC43)        | 1                                                    |
| 2012              | <i>Brucella abortus</i>             | 2                                                    |
| 1999              | <i>Burkholderia pseudomallei</i>    | 1                                                    |
| 1998              | <i>Campylobacter coli</i>           | 1                                                    |
| 2007              | <i>Campylobacter fetus</i>          | 1                                                    |
| 1998              | <i>Campylobacter jejuni</i>         | 1                                                    |
| 1929              | <i>Candida albicans</i>             | 1                                                    |
| 1997              | <i>Candida albicans</i>             | 3                                                    |
| 1999              | <i>Capillaria philippinensis</i>    | 1                                                    |
| 1970              | <i>Centrocestus formosanus</i>      | 1                                                    |
| 1977              | Chikungunya virus                   | 1                                                    |
| 1994              | Chikungunya virus                   | 2                                                    |
| 1922              | <i>Chlamydia trachomatis</i>        | 3                                                    |
| 2006              | <i>Chlamydia trachomatis</i>        | 1                                                    |
| 2008              | <i>Chromobacterium violaceum</i>    | 1                                                    |
| 1936              | <i>Chryseobacterium indologenes</i> | 1                                                    |
| 1928              | <i>Chrysomya bezziana</i>           | 3                                                    |
| 1941              | <i>Chrysomya bezziana</i>           | 1                                                    |
| 1923              | <i>Clonorchis sinensis</i>          | 1                                                    |

|      |                                    |   |
|------|------------------------------------|---|
| 1937 | <i>Clonorchis sinensis</i>         | 3 |
| 2017 | <i>Clostridium difficile</i>       | 1 |
| 1918 | <i>Clostridium tetani</i>          | 3 |
| 2015 | <i>Clostridium tetani</i>          | 2 |
| 1906 | <i>Corynebacterium diphtheriae</i> | 3 |
| 1931 | <i>Corynebacterium diphtheriae</i> | 1 |
| 2015 | <i>Corynebacterium diphtheriae</i> | 2 |
| 2010 | <i>Coxiella burnetti</i>           | 2 |
| 2005 | <i>Cyclospora cayetanensis</i>     | 1 |
| 2013 | <i>Cytoisospora belli</i>          | 1 |
| 1911 | Dengue virus                       | 3 |
| 1992 | Dengue virus                       | 2 |
| 2010 | Dengue virus                       | 1 |
| 1929 | <i>Dicrocoelium dendriticum</i>    | 1 |
| 2009 | <i>Diphyllbothrium latum</i>       | 1 |
| 1974 | <i>Diphyllbothrium mansonii</i>    | 1 |
| 1977 | <i>Dipylidium caninum</i>          | 1 |
| 2005 | <i>Echinochasmus japonicus</i>     | 1 |
| 1928 | <i>Echinococcus granulosus</i>     | 3 |
| 1975 | <i>Echinococcus granulosus</i>     | 1 |
| 2012 | <i>Echinostoma macrorchis</i>      | 1 |
| 2012 | <i>Echinostoma malayanum</i>       | 1 |
| 2012 | <i>Echinostoma revolutum</i>       | 1 |
| 1914 | <i>Entamoeba histolytica</i>       | 3 |
| 1923 | <i>Entamoeba histolytica</i>       | 1 |
| 2011 | <i>Enterobacter aerogenes</i>      | 1 |
| 1995 | <i>Enterobacter cloacae</i>        | 1 |
| 1909 | <i>Enterobius vermicularis</i>     | 3 |
| 1923 | <i>Enterobius vermicularis</i>     | 1 |
| 2011 | <i>Enterococcus faecalis</i>       | 1 |
| 2009 | Enterovirus A                      | 1 |
| 1966 | Epstein-Barr virus                 | 3 |
| 1914 | <i>Escherichia coli</i>            | 3 |
| 1927 | <i>Escherichia coli</i>            | 1 |
| 1977 | <i>Exophiala jeanselmei</i>        | 3 |
| 1989 | <i>Fasciola gigantica</i>          | 1 |
| 1930 | <i>Fasciola hepatica</i>           | 1 |
| 1930 | <i>Fasciolopsis buski</i>          | 1 |
| 1923 | <i>Fusobacterium necrophorum</i>   | 1 |
| 1923 | <i>Giardia intestinalis</i>        | 1 |
| 1974 | <i>Gnathostoma spinigerum</i>      | 1 |
| 1926 | <i>Haemophilus aegyptus</i>        | 1 |
| 1907 | <i>Haemophilus ducreyi</i>         | 3 |



|      |                                            |   |
|------|--------------------------------------------|---|
| 1923 | <i>Haemophilus ducreyi</i>                 | 1 |
| 1927 | <i>Haemophilus influenzae</i>              | 1 |
| 1989 | <i>Haplorchis pumilio</i>                  | 1 |
| 1989 | <i>Haplorchis taichui</i>                  | 1 |
| 1989 | <i>Haplorchis yokogawai</i>                | 1 |
| 2000 | <i>Helicobacter pylori</i>                 | 1 |
| 1998 | Hepatitis A virus                          | 2 |
| 1965 | Hepatitis B virus                          | 2 |
| 2008 | Hepatitis B virus                          | 1 |
| 1998 | Hepatitis C virus                          | 2 |
| 2008 | Hepatitis C virus                          | 1 |
| 1998 | Hepatitis E virus                          | 2 |
| 2010 | Hepatitis E virus                          | 1 |
| 1997 | Herpes simplex virus 1                     | 3 |
| 2008 | Herpes simplex virus 2                     | 3 |
| 1927 | Human alphaherpesvirus 3                   | 3 |
| 2013 | Human bocavirus                            | 1 |
| 1989 | Human immunodeficiency virus (unspecified) | 2 |
| 2010 | Human Metapneumovirus                      | 1 |
| 2012 | human papillomavirus                       | 1 |
| 1925 | Human papillomavirus                       | 3 |
| 2013 | Human Respiratory Syncytial virus          | 1 |
| 2009 | <i>Hymenolepis diminuta</i>                | 1 |
| 1991 | <i>Hymenolepis nana</i>                    | 1 |
| 1900 | Influenza A virus                          | 3 |
| 2007 | Influenza A virus                          | 1 |
| 2010 | Influenza A virus                          | 2 |
| 2007 | Influenza B virus                          | 1 |
| 2013 | Influenza C virus                          | 1 |
| 1977 | Japanese encephalitis virus                | 1 |
| 1989 | Japanese encephalitis virus                | 2 |
| 1992 | Japanese encephalitis virus                | 3 |
| 1995 | <i>Klebsiella oxytoca</i>                  | 1 |
| 1930 | <i>Klebsiella pneumoniae</i>               | 1 |
| 1997 | <i>Leptospira interrogans</i>              | 2 |
| 2015 | <i>Leptospira interrogans</i>              | 1 |
| 2011 | <i>Listeria monocytogenes</i>              | 1 |
| 1929 | <i>Macracanthorhynchus hirudinaceus</i>    | 1 |
| 1923 | <i>Malassezia furfur</i>                   | 1 |
| 1906 | Measles virus                              | 3 |
| 2011 | Measles virus                              | 2 |
| 1927 | <i>Moraxella lacunata</i>                  | 1 |
| 1959 | <i>Morganella morganii</i>                 | 1 |

|      |                                    |   |
|------|------------------------------------|---|
| 1906 | Mumps virus                        | 3 |
| 2014 | Mumps virus                        | 1 |
| 2012 | <i>Mycobacterium bovis</i>         | 2 |
| 1903 | <i>Mycobacterium leprae</i>        | 3 |
| 1917 | <i>Mycobacterium leprae</i>        | 1 |
| 1900 | <i>Mycobacterium tuberculosis</i>  | 3 |
| 1920 | <i>Mycobacterium tuberculosis</i>  | 1 |
| 1936 | <i>Mycobacterium tuberculosis</i>  | 2 |
| 1924 | <i>Necator americanus</i>          | 1 |
| 1900 | <i>Neisseria gonorrhoeae</i>       | 3 |
| 1923 | <i>Neisseria gonorrhoeae</i>       | 1 |
| 1926 | <i>Neisseria meningitidis</i>      | 1 |
| 1926 | <i>Neisseria meningitidis</i>      | 3 |
| 2006 | <i>Neorickettsia sennetsu</i>      | 1 |
| 2015 | <i>Nocardia aobensis</i>           | 1 |
| 1977 | <i>Nocardia brasiliensi</i>        | 1 |
| 1930 | <i>Opisthorchis felinus</i>        | 1 |
| 1968 | <i>Opisthorchis viverrini</i>      | 1 |
| 1930 | <i>Orientia tsutsugamushi</i>      | 3 |
| 1938 | <i>Orientia tsutsugamushi</i>      | 2 |
| 2015 | <i>Orientia tsutsugamushi</i>      | 1 |
| 2013 | <i>Paragonimus bangkokensis</i>    | 1 |
| 1997 | <i>Paragonimus harinasutai</i>     | 1 |
| 1969 | <i>Paragonimus heterotremus</i>    | 1 |
| 2013 | <i>Paragonimus paishuihoensis</i>  | 1 |
| 1969 | <i>Paragonimus westermani</i>      | 1 |
| 2013 | Parainfluenza virus 1              | 1 |
| 2010 | Parainfluenza virus 3              | 1 |
| 2013 | Parainfluenza virus 4              | 1 |
| 2005 | <i>Penicillium marneffei</i>       | 1 |
| 2009 | <i>Phaneropsolus bonnei</i>        | 1 |
| 1977 | <i>Phialophora pedrosoi</i>        | 1 |
| 1925 | <i>Plasmodium falciparum</i>       | 1 |
| 1925 | <i>Plasmodium malariae</i>         | 1 |
| 1997 | <i>Plasmodium ovale</i>            | 1 |
| 1923 | <i>Plasmodium vivax</i>            | 1 |
| 1928 | Poliovirus unspecified             | 3 |
| 1966 | Poliovirus unspecified             | 1 |
| 1966 | Poliovirus unspecified             | 2 |
| 2009 | <i>Prosthodendrium molenkampii</i> | 1 |
| 1995 | <i>Proteus mirabilis</i>           | 1 |
| 1995 | <i>Proteus vulgaris</i>            | 1 |
| 1931 | <i>Pseudomonas aeruginosa</i>      | 1 |

|      |                                     |   |
|------|-------------------------------------|---|
| 1906 | Rabies virus                        | 3 |
| 1929 | Rabies virus                        | 1 |
| 1929 | Rabies virus                        | 2 |
| 2010 | Respiratory Syncytial virus (RSVA)  | 1 |
| 2006 | <i>Rickettsia conorii</i>           | 2 |
| 2006 | <i>Rickettsia felis</i>             | 2 |
| 2009 | <i>Rickettsia felis</i>             | 1 |
| 2006 | <i>Rickettsia helvetica</i>         | 2 |
| 2016 | <i>Rickettsia japonica</i>          | 2 |
| 1907 | <i>Rickettsia Prowazekii</i>        | 3 |
| 2006 | <i>Rickettsia tamurae</i>           | 2 |
| 2006 | <i>Rickettsia typhi</i>             | 2 |
| 2015 | <i>Rickettsia typhi</i>             | 1 |
| 1922 | Roseolovirus                        | 3 |
| 1907 | Rubella virus                       | 3 |
| 2011 | Rubella virus                       | 2 |
| 1909 | <i>Salmonella enterica</i>          | 3 |
| 1925 | <i>Salmonella enterica</i>          | 1 |
| 1929 | <i>Salmonella enterica</i>          | 2 |
| 1989 | <i>Sarcocystis hominis</i>          | 1 |
| 1904 | <i>Sarcoptes scabiei</i>            | 1 |
| 1973 | <i>Schistosoma mekongi</i>          | 1 |
| 1989 | <i>Schistosoma spindale</i>         | 1 |
| 2011 | Seoul virus                         | 1 |
| 1977 | <i>Shigella boydii</i>              | 1 |
| 1994 | <i>Shigella dysenteriae</i>         | 1 |
| 1969 | <i>Shigella flexneri</i>            | 1 |
| 1969 | <i>Shigella sonnei</i>              | 1 |
| 1977 | Sindbis Virus                       | 1 |
| 2014 | <i>Spirometra erinaceieuropaei</i>  | 1 |
| 2005 | <i>Sporothrix schenckii</i>         | 1 |
| 1969 | <i>Staphylococcus aureus</i>        | 1 |
| 1977 | <i>Staphylococcus aureus</i>        | 3 |
| 1995 | <i>Staphylococcus epidermidis</i>   | 1 |
| 1977 | <i>Staphylococcus epidermidis</i>   | 3 |
| 1995 | <i>Staphylococcus saprophyticus</i> | 1 |
| 1989 | <i>Stellantchasmus falcatus</i>     | 1 |
| 2011 | <i>Streptococcus agalactiae</i>     | 1 |
| 1907 | <i>Streptococcus group A</i>        | 3 |
| 2009 | <i>Streptococcus mutans</i>         | 1 |
| 1923 | <i>Streptococcus pneumoniae</i>     | 1 |
| 1929 | <i>Streptococcus pneumoniae</i>     | 3 |
| 1915 | <i>Streptococcus pyogenes</i>       | 3 |

|      |                                       |   |
|------|---------------------------------------|---|
| 1930 | <i>Streptococcus pyogenes</i>         | 1 |
| 2014 | <i>Streptococcus suis</i>             | 1 |
| 1923 | <i>Strongyloides stercoralis</i>      | 1 |
| 2009 | <i>Taenia asiatica</i>                | 1 |
| 2010 | <i>Taenia hydatigena</i>              | 1 |
| 1923 | <i>Taenia saginata</i>                | 1 |
| 1930 | <i>Taenia solium</i>                  | 1 |
| 1930 | <i>Toxocara canis</i>                 | 1 |
| 1989 | <i>Toxocara cati</i>                  | 1 |
| 2014 | <i>Toxocara vitulorum</i>             | 1 |
| 1992 | <i>Toxoplasma gondii</i>              | 2 |
| 1901 | <i>Treponema pallidum</i>             | 1 |
| 1926 | <i>Treponema pallidum</i>             | 2 |
| 1900 | <i>Treponema pallidum</i>             | 3 |
| 1923 | <i>Treponema vincentii</i>            | 1 |
| 1973 | <i>Trichinella spiralis</i>           | 1 |
| 1969 | <i>Trichomonas vaginalis</i>          | 1 |
| 1908 | <i>Trichophyton concentricum</i>      | 3 |
| 1923 | <i>Trichophyton concentricum</i>      | 1 |
| 1928 | <i>Trichophyton violaceum</i>         | 1 |
| 1929 | <i>Trichostrongylus colubriformis</i> | 1 |
| 1922 | <i>Trichuris trichiura</i>            | 1 |
| 1922 | <i>Trichuris trichiura</i>            | 3 |
| 2014 | <i>Tropheryma whipplei</i>            | 1 |
| 2014 | <i>Trypanosoma lewisi</i>             | 1 |
| 1907 | varicella-zoster virus                | 3 |
| 2015 | varicella-zoster virus                | 2 |
| 1893 | variola virus                         | 3 |
| 1874 | <i>Vibrio cholerae</i>                | 3 |
| 1925 | <i>Vibrio cholerae</i>                | 1 |
| 1998 | <i>Vibrio parahaemolyticus</i>        | 1 |
| 1979 | <i>Wuchereria bancrofti</i>           | 1 |
| 1915 | <i>Yersinia pestis</i>                | 3 |
| 1917 | <i>Yersinia pestis</i>                | 1 |
| 2016 | Zika virus                            | 1 |

Table 2. Total number of pathogens observed in Laos between 1974 and 2016 by taxa

| Domain | Bacteria | Viruses | Protozoa | Fungi | Arthropods | Helminths |
|--------|----------|---------|----------|-------|------------|-----------|
| Totals | 101      | 58      | 14       | 10    | 3          | 58        |

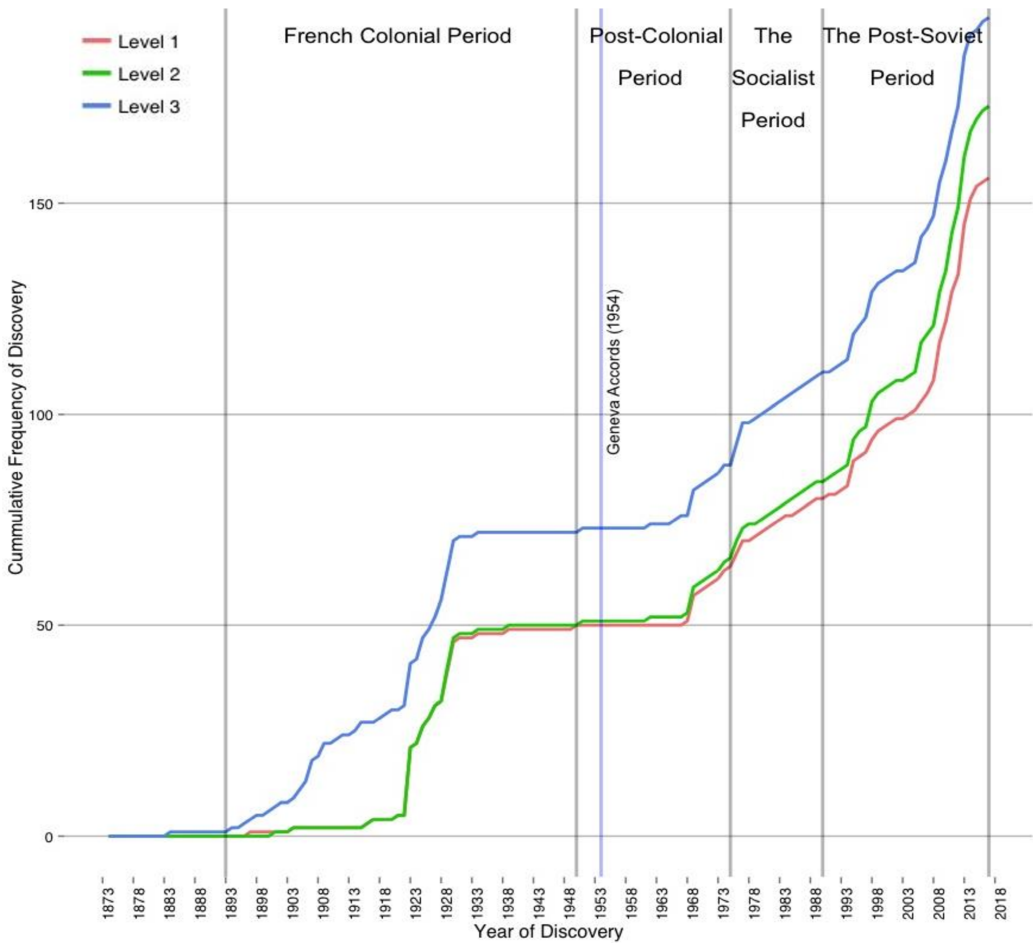

Figure 2: The cummulative frequency of human pathogen discovery in Laos for the period 1874 to 2017 layered by level, where Level 1 represents only culture, molecular (which includes PCR diagnosis or direct microscope observation) discovery, Level 2 is representative of the first discoveries with either a chemical or immune reaction based diagnosis or culture, molecular discovery and, Level 3 is representative of the first discoveries made at any grade of evidence. The vertical blue line identifies the year 1954, the year of the Geneva accords.

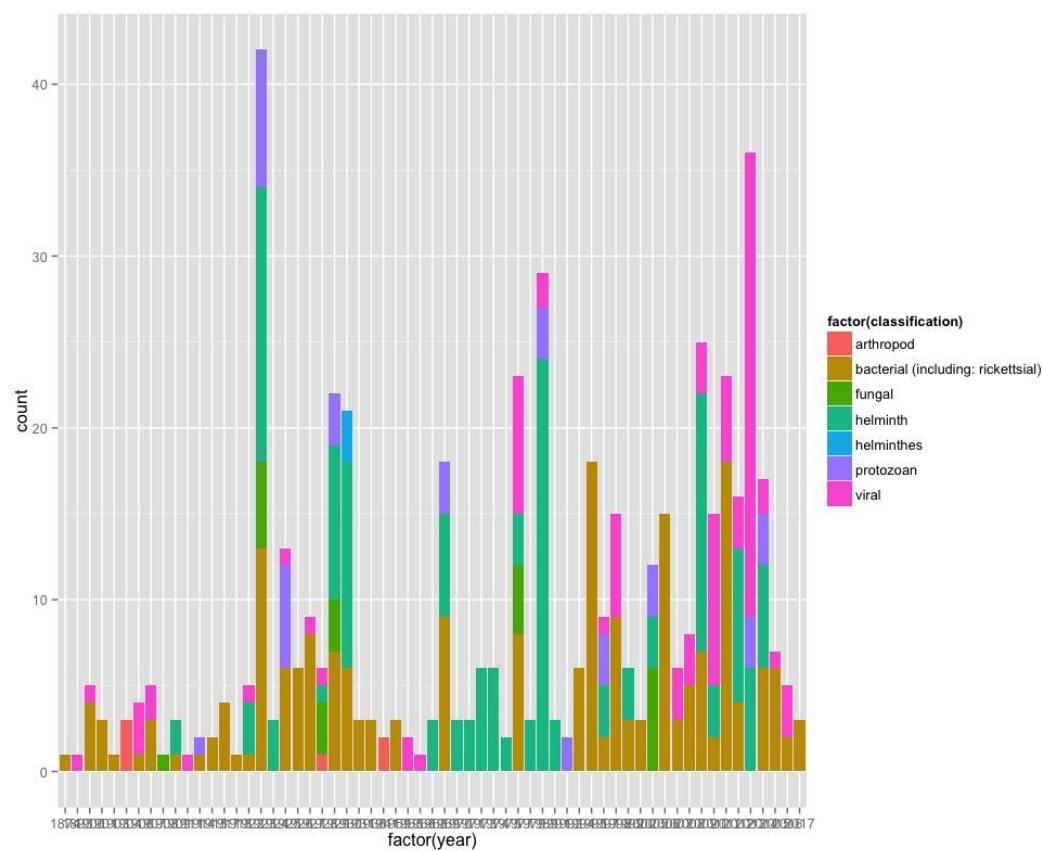

Figure 3 : Frequency of discoveries by year and classification

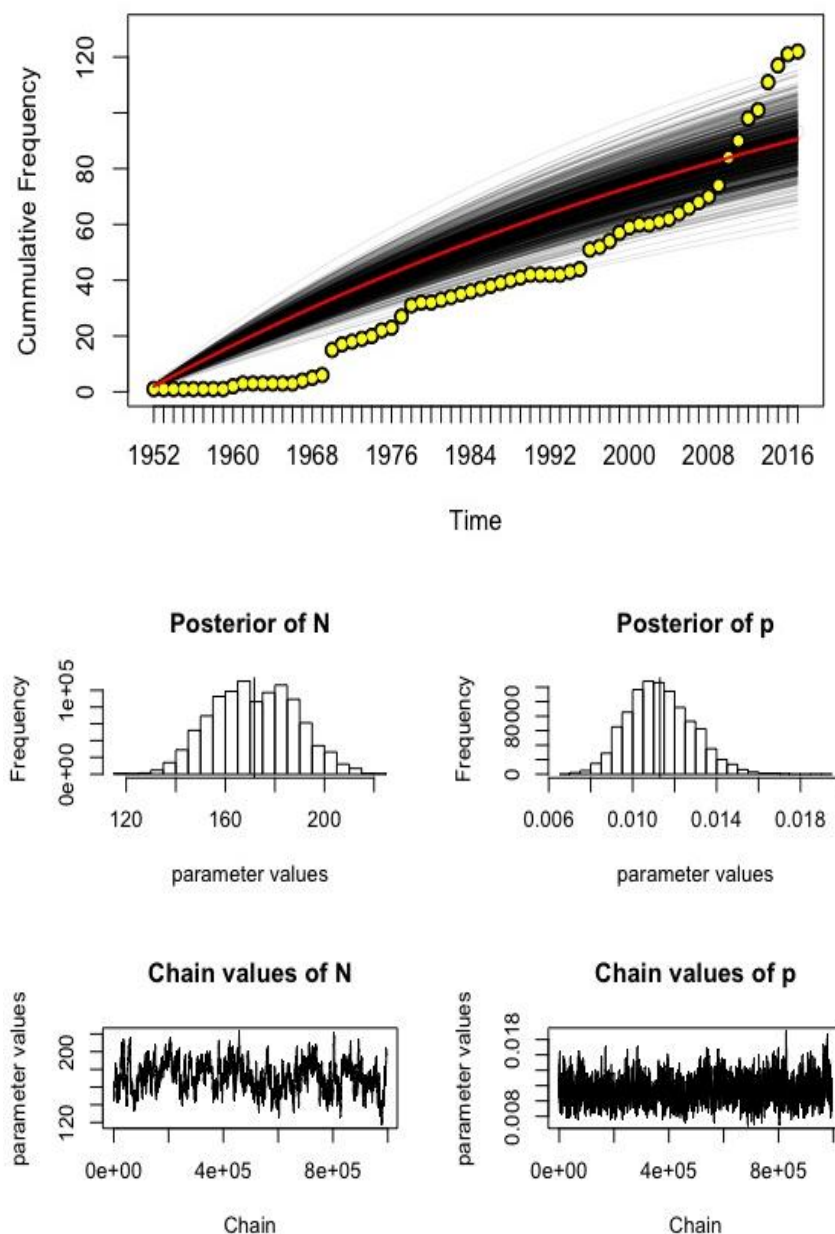

Figure 4: Discovery curve Model for level I data and MCMC output the yellow points represent the observed data, the red line is the best fitting model for a constant discovery rate and the black-lines represent the uncertainty in the model estimates. Underneath the model are a series of histograms which represent the posterior distributions of parameter estimates.

*The chain output can be seen at the bottom of the figure and represent the range of parameter values tested and the number of iterations.*
